# Supplementary material for: Translocation, Rejection and Trapping of Polyampholytes
Source: MDPI journal article supplement (doi:10.3390/polym14040797), 2022-02-18
Supplement: s1 [file s1]

## Supporting Information

### Translocation, rejection and trapping of polyampholytes

Yeong-Beom Kim, Min-Kyung Chae,<sup>1</sup> Jeong-Man Park,<sup>2, a)</sup> Albert Johner,<sup>3, b)</sup> and  
Nam-Kyung Lee<sup>1, c)</sup>

<sup>1)</sup>*Department of Physics and Astronomy, Sejong University, Seoul 05006,  
Korea*

<sup>2)</sup>*Department of Physics, The Catholic University of Korea, Bucheon 14662,  
Korea*

<sup>3)</sup>*Institut Charles Sadron CNRS-Unistra, 23 Rue de Loess,  
67034 Strasbourg CEDEX 2, France*

---

<sup>a)</sup>Electronic mail: jmanpark@catholic.ac.kr

<sup>b)</sup>Electronic mail: albert.johner@ics-cnrs.unistra.fr

<sup>c)</sup>Electronic mail: lee@sejong.ac.kr

### A. Distributions of translocation times in *cis-to-trans* direction

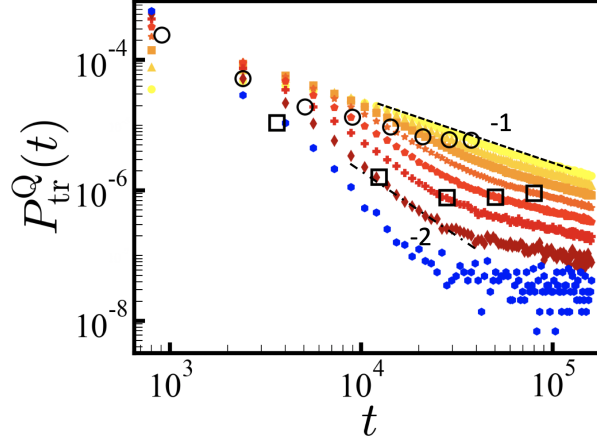

Figure S1. Distributions of translocation times in *cis-to-trans* direction for various  $Q$ -ensemble of  $N = 20$ . The PDF measures the fraction of translocated sequences at given time interval  $[t - \delta t/2, t + \delta t/2]$  with  $\delta t = 1600$  MCT for each  $Q$ -ensemble. Each distribution is normalized by the total number of successfully translocated sequences with  $t_w = 1.6 \times 10^5$  MCT. Colors from yellow to blue represent values of favorable net charges  $Q = 0, 2, 4, 6, 8, 10, 12$  and  $14$ , respectively. The dashed lines are the guide for eyes indicating power law relation,  $P(t) \sim t^{-(1+\mu)}$  with  $\mu = 0$  and  $1$ . For each  $Q$ , we indicate average translocation times  $\langle t_{\text{tr}} \rangle$  by  $\circ$ . The  $\langle t_{\text{tr}}(Q) \rangle$  decreases with increasing net charges. The square symbols for  $Q = 6, 8, 10, 12, 14$  represent average translocation times  $\langle t_{\text{tr}}(Q) \rangle$  with total MC time  $10^6$  MCT.

## B. Translocation, rejection, and trapping in *cis-to-trans* and reverse directions

We compare translocation behavior in both directions for exactly enumerated  $N = 20$  sequences and for random  $N = 40$  sequences.

Table S1. The populations of translocation, rejection and trapping in both directions. Total number of sequences in the tested ensembles are  $2^{20}$  for  $N = 20$  and  $10^7$  for  $N = 40$ .

| $N (t_w)$                               | direction           | translocation(%) | rejection(%) | trapping(%) |
|-----------------------------------------|---------------------|------------------|--------------|-------------|
| $N = 20$<br>( $t_w = 1.6 \times 10^5$ ) | <i>cis-to-trans</i> | 9.3              | 76.9         | 13.8        |
|                                         | reverse             | 9.1              | 74.6         | 16.3        |
| $N = 40$<br>( $t_w = 10^6$ )            | <i>cis-to-trans</i> | 1.6              | 77.0         | 21.4        |
|                                         | reverse             | 1.0              | 74.6         | 24.4        |
| $N = 20$<br>( $t_w = 1.6 \times 10^5$ ) | <i>cis-to-trans</i> | 11.4             | 78.9         | 9.7         |
|                                         | reverse             | 10.9             | 77.0         | 12.1        |

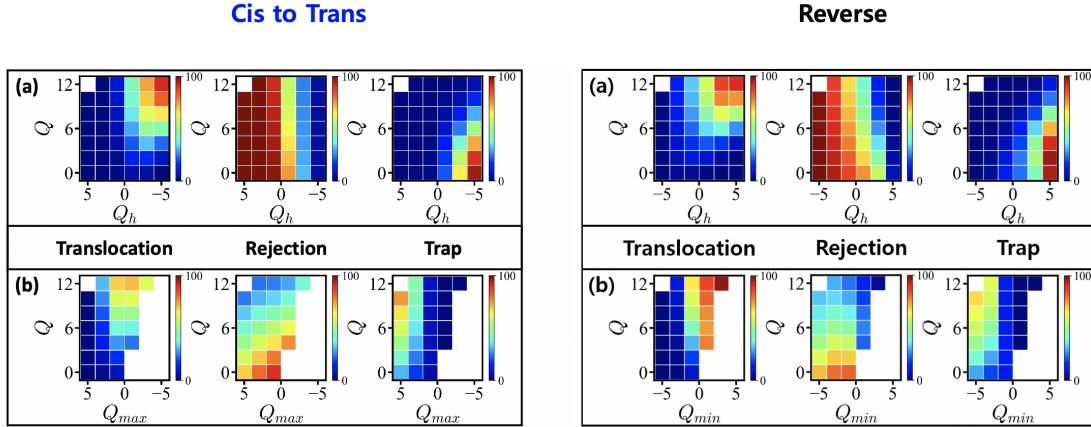

Figure S2.  $N = 20$ . The percentages of translocated/rejected/trapped populations are measured with  $t_w = 1.6 \times 10^5$  MCT. The left panel shows data in *cis-to-trans* direction and the right panel shows the data in the reverse direction. Upper panels show the data for the given net charge of head sequence  $Q_h$  and  $Q$  and lower panels show the data for the minimum net charge  $Q_{min}$  of the segment of length  $5a$  and  $Q$ . Color codes are displayed in neighboring color bars.

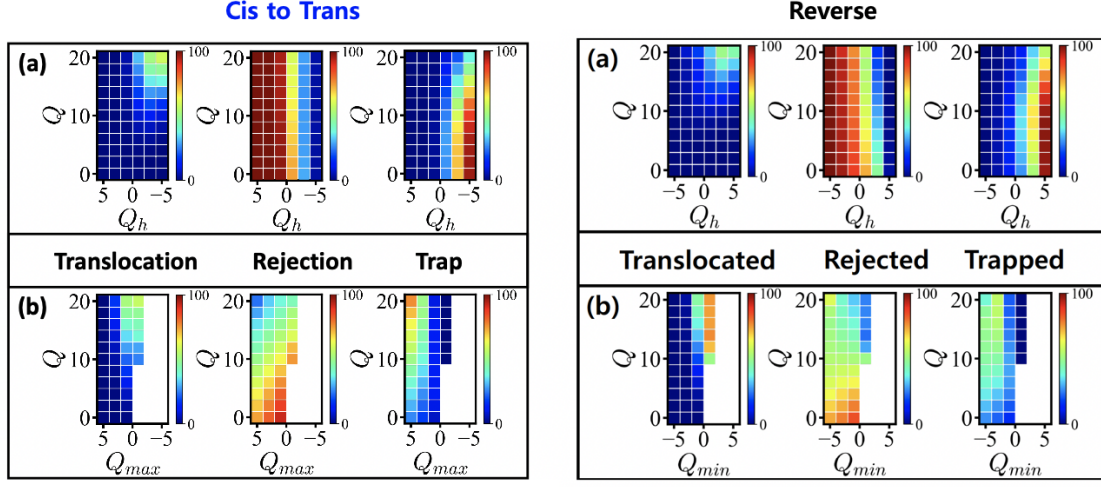

Figure S3.  $N = 40$ . The percentages of translocated/rejected/trapped populations are measured at  $t_w = 1.6 \times 10^5$  MCT. The left panel shows data in *cis-to-trans* direction and the right panel shows the data in the reverse direction. Upper panels show the data for the given net charge of head sequence  $Q_h$  and  $Q$  and lower panels show the data for the minimum net charge  $Q_{min}$  of the segment of length  $5a$  and  $Q$ . Color codes are displayed in neighboring color bars.
